# Supplementary material for: Fc-fusion proteins: new developments and future perspectives
Source: PubMed Central journal article supplement (PMC3491832; doi:10.1002/emmm.201201379), 2012-07-26
Supplement: emmm0004-1015-SD1.pdf [file emmm0004-1015-SD1.pdf]

# Fc-fusion proteins: new developments and future perspectives

Daniel M Czajkowsky<sup>1,2</sup>, Jun Hu<sup>2</sup>, Zhifeng Shao<sup>1</sup>, and Richard J Pleass<sup>3\*</sup>

<sup>1</sup>Key Laboratory of Systems Biomedicine (Ministry of Education) & State Key Laboratory of Oncogenes & Related Genes, Shanghai Jiao Tong University, Shanghai, China;

<sup>2</sup>Laboratory of Physical Biology, Shanghai Institute of Applied Physics, Chinese Academy of Sciences, Shanghai, China; <sup>3</sup>Liverpool School of Tropical Medicine, Pembroke Place, Liverpool, L3 5QA, UK.

Supporting information table of contents

Table S1. Fc-fusion approaches in vaccines - page 1.

Table S2. Summary of modifications - page 2.

**Table S1. Fc-fusion approaches in vaccines**

| Target                | Type of Fc-fusion               | Type of vaccine (route admin)      | Immunogenicity/ Tolerogenicity                                                       | Neutralization <i>in vitro</i>                             | Neutralization <i>in vivo</i>                                          | Mechanism of action                            | Ref   |
|-----------------------|---------------------------------|------------------------------------|--------------------------------------------------------------------------------------|------------------------------------------------------------|------------------------------------------------------------------------|------------------------------------------------|-------|
| Clostridium botulinum | BoNT-hIgG1 Fc x2                | Protein +mlipidA + squalene (s.c.) | Immunogenic in mice, Fc-fusion superior to non-targeted BoNT                         | Yes                                                        | n.d.                                                                   | Fc $\gamma$ R dependent                        | 1     |
| HIV                   | p24-mlgG1 and IgG2a             | Protein or DNA (i.p./i.m.)         | Immunogenic in mice, mouse IgG2a superior to mouse IgG1                              | Yes                                                        | n.d.                                                                   | Fc $\gamma$ R dependent ADCC & CDC independent | 2     |
|                       | p24-mlgG2a                      | Protein + CpG (i.n.)               | Immunogenic in mice                                                                  | Yes                                                        | Yes, on vaginal challenge                                              | FcRn dependent                                 | 3     |
|                       | gp41-hlgG1                      | Protein + FCA (s.c.)               | Immunogenic in rabbits                                                               | Yes, in human PBMC assay                                   | n.d.                                                                   | n.d.                                           | 4     |
|                       | gp120-hlgG1                     | Protein (no adjuvant)              | Immunogenic in mice (no benefit to oligomerization Fc)                               | n.d.                                                       | n.d.                                                                   | Fc-dependent                                   | 5     |
|                       | g24-hlgA1                       | Protein + alum (s.c.)              | Poorly immunogenic                                                                   | n.d.                                                       | n.d.                                                                   | n.d.                                           | 6     |
| Influenza             | Hemagglutinin -mlgG2a           | Protein (i.p.)                     | Immunogenic in mice                                                                  | Yes                                                        | n.d.                                                                   | n.d.                                           | 2     |
|                       | Hemagglutinin -hlgG1            | Protein (s.c.)                     | Immunogenic in mice                                                                  | Yes                                                        | n.d.                                                                   | n.d.                                           | 7     |
| Ebola                 | Filovirus glycoprotein-hlgG1    | Protein (i.p. + FCA)               | Immunogenic, Ab titers 1:64,000                                                      | Yes, in plaque reduction assay                             | 7/8 mice protected                                                     | Fc-dependent                                   | 8     |
| Hepatitis             | HBsAg-mlgG2a                    | Lentiviral footpad or DNA (i.m.)   | Immunogenic                                                                          | Yes, Fc $\gamma$ R induction of CD4+/CD8+ T cell responses | Seroconversion in HBsAg low Tg mice                                    | n.d.                                           | 9, 10 |
| HSV-2                 | gD-modified mlgG2a              | Protein + CpG (i.n.)               | Immunogenic, high mlgG2a responses when co-administered with CpG                     | Yes                                                        | 80% survival on vaginal challenge<br>Long-lived memory cells generated | FcRn dependent                                 | 11    |
| Avian influenza       | Hemagglutinin HA1-hlgG1         | Protein +SAS (s.c.)                | Immunogenic, clade transcendent IgG generated                                        | Yes                                                        | Yes, reduced viral replication and lung damage                         | 90-100% survival                               | 12    |
| Pseudorabies virus    | Mouse transferrin receptor-mgG1 | Inactivated virus                  | Immunogenic, high mlgG2a elicited                                                    | Yes                                                        | Yes                                                                    | n.d.                                           | 13    |
| Malaria               | PfMSP119-mlgG2a or hlgG1        | Protein $\pm$ alum (i.p.)          | Immunogenic as monomer, high IgG1 responses (no benefit to oligomerization)          | n.d.                                                       | No, to i.p. challenge with infected erythrocytes                       | n.d.                                           | 14    |
|                       | CTLA4-hlgG1-Fc-PyMSP4/5         | Adenovirus (i.m.)                  | Tolerogenic at high dose                                                             | n.d.                                                       | n.d.                                                                   | n.d.                                           | 15    |
| Schistosomiasis       | CE-mlgG2a                       | Protein (i.p.)                     | Poorly immunogenic compared to CE-HIS in Alum and complete ablation of IgE responses | n.d.                                                       | No, to cercarial challenge                                             | n.d.                                           | 14    |
| Cancer                | Cytokine-mlgG1                  | DNA-injection                      | Yes, improved T cell responses                                                       | Yes                                                        | n.d.                                                                   | n.d.                                           | 16    |

|                        |                                                           |         |                                               |      |                                          |                                                    |                  |
|------------------------|-----------------------------------------------------------|---------|-----------------------------------------------|------|------------------------------------------|----------------------------------------------------|------------------|
|                        |                                                           |         | compared with non-Fc fusions                  |      |                                          |                                                    |                  |
| Cancer (neuroblastoma) | Mimotope-mIgG2a                                           | Protein | Yes, with DC's pulsed with 47-LDA-mouse IgG2a | Yes  | Yes                                      | n.d.                                               | <sup>17</sup>    |
| Cancer B cell lymphoma | NKG2D-Fc                                                  | Protein | Safe                                          | Yes  | Yes                                      | Complement                                         | <sup>18</sup>    |
| Arthritis              | Class II MHC-mIgG3                                        | Protein | Induction of Ag-specific hyporesponsiveness   | n.d. | Yes                                      | Inhibits autoreactive T cells by cross-linking TCR | <sup>19</sup>    |
| Encephalomyelitis      | Myelin basic protein-mIgG1                                | Protein | Yes, increased T cell proliferative responses | n.d. | n.d.                                     | FcRn dependent                                     | <sup>20</sup>    |
| Allergy                | Fc <sub>γ</sub> -Fcε<br>Feld1-hIgG1-Fc<br>Fc-DARPin-hIgG1 | Protein | Inhibitory                                    | Yes  | Inhibits mast cell and basophil function | Fc-dependent                                       | <sup>21-23</sup> |

n.d., not determined; mIgG, mouse IgG; hIgG, human IgG; s.c., sub-cutaneous; i.n., intranasal; i.p, intraperitoneal; i.v., intravenous; FCA, Freund's complete adjuvant; PfMSP1-19, *Plasmodium falciparum* merozoite surface protein 1-19; HSV, Herpes Simplex Virus; BoNT, Botulinum neurotoxin; CTLA4, cytotoxic T lymphocyte antigen; NKG2D, Natural Killer cell receptor G2D.

1. White, D.M. et al. Rapid immune responses to a botulinum neurotoxin Hc subunit vaccine through in vivo targeting to antigen-presenting cells. *Infection and immunity* **79**, 3388-3396 (2011).
2. Zaharatos, G.J. et al. HIV-1 and influenza antigens synthetically linked to IgG2a Fc elicit superior humoral responses compared to unmodified antigens in mice. *Vaccine* **30**, 42-50 (2011).
3. Lu, L. et al. A neonatal Fc receptor-targeted mucosal vaccine strategy effectively induces HIV-1 antigen-specific immunity to genital infection. *Journal of virology* **85**, 10542-10553 (2011).
4. Zhang, M.Y., Wang, Y., Mankowski, M.K., Ptak, R.G. & Dimitrov, D.S. Cross-reactive HIV-1-neutralizing activity of serum IgG from a rabbit immunized with gp41 fused to IgG1 Fc: possible role of the prolonged half-life of the immunogen. *Vaccine* **27**, 857-863 (2009).
5. Chen, H., Xu, X. & Jones, I.M. Immunogenicity of the outer domain of a HIV-1 clade C gp120. *Retrovirology* **4**, 33 (2007).
6. Obregon, P. et al. HIV-1 p24-immunoglobulin fusion molecule: a new strategy for plant-based protein production. *Plant biotechnology journal* **4**, 195-207 (2006).
7. Loureiro, S. et al. Adjuvant-free immunization with hemagglutinin-Fc fusion proteins as an approach to influenza vaccines. *Journal of virology* **85**, 3010-3014 (2011).
8. Konduru, K. et al. Ebola virus glycoprotein Fc fusion protein confers protection against lethal challenge in vaccinated mice. *Vaccine* **29**, 2968-2977 (2011).
9. Hong, Y. et al. Lentivector expressing HBsAg and immunoglobulin Fc fusion antigen induces potent immune responses and results in seroconversion in HBsAg transgenic mice. *Vaccine* **29**, 3909-3916 (2011).
10. Hong, Y. et al. Immunoglobulin fc fragment tagging allows strong activation of endogenous CD4 T cells to reshape the tumor milieu and enhance the antitumor effect of lentivector immunization. *J Immunol* **188**, 4819-4827 (2012).
11. Ye, L., Zeng, R., Bai, Y., Roopenian, D.C. & Zhu, X. Efficient mucosal vaccination mediated by the neonatal Fc receptor. *Nature biotechnology* **29**, 158-163 (2011).

12. Du, L. et al. A recombinant vaccine of H5N1 HA1 fused with foldon and human IgG Fc induced complete cross-clade protection against divergent H5N1 viruses. *PLoS one* **6**, e16555 (2011).
13. Takashima, Y. et al. Immunization with pseudorabies virus harboring Fc domain of IgG makes a contribution to protection of mice from lethal challenge. *Vaccine* **23**, 3775-3782 (2005).
14. Mekhaie, D.N. et al. Polymeric human Fc-fusion proteins with modified effector functions. *Scientific reports* **1**, 124 (2011).
15. Logan, G.J. et al. Antigen-specific humoral tolerance or immune augmentation induced by intramuscular delivery of adeno-associated viruses encoding CTLA4-Ig-antigen fusion molecules. *Gene therapy* **16**, 200-210 (2009).
16. Ferrone, C.R. et al. Adjuvanticity of plasmid DNA encoding cytokines fused to immunoglobulin Fc domains. *Clinical cancer research : an official journal of the American Association for Cancer Research* **12**, 5511-5519 (2006).
17. Gil, M. et al. Targeting a mimotope vaccine to activating Fcγ receptors empowers dendritic cells to prime specific CD8<sup>+</sup> T cell responses in tumor-bearing mice. *J Immunol* **183**, 6808-6818 (2009).
18. Zhang, B. et al. Immune Surveillance and Therapy of Lymphomas Driven by Epstein-Barr Virus Protein LMP1 in a Mouse Model. *Cell* **148**, 739-751 (2012).
19. Zuo, L. et al. A single-chain class II MHC-IgG3 fusion protein inhibits autoimmune arthritis by induction of antigen-specific hyporesponsiveness. *J Immunol* **168**, 2554-2559 (2002).
20. Mi, W. et al. Targeting the neonatal Fc receptor for antigen delivery using engineered Fc fragments. *J Immunol* **181**, 7550-7561 (2008).
21. Zhu, D. et al. A chimeric human-cat fusion protein blocks cat-induced allergy. *Nature medicine* **11**, 446-449 (2005).
22. Zhu, D., Kepley, C.L., Zhang, M., Zhang, K. & Saxon, A. A novel human immunoglobulin Fc gamma Fc epsilon bifunctional fusion protein inhibits Fc epsilon RI-mediated degranulation. *Nature medicine* **8**, 518-521 (2002).
23. Eggel, A. et al. Inhibition of ongoing allergic reactions using a novel anti-IgE DARPIn-Fc fusion protein. *Allergy* **66**, 961-968 (2011).

**Table S2. Summary of modifications**

|                                                        |               |                                                                                                                                                                                                                                                                                                                                                                                                                                                                                     |
|--------------------------------------------------------|---------------|-------------------------------------------------------------------------------------------------------------------------------------------------------------------------------------------------------------------------------------------------------------------------------------------------------------------------------------------------------------------------------------------------------------------------------------------------------------------------------------|
| <b>Change heavy chain</b>                              | IgG2, IgG4    | Lower affinity for Fc $\gamma$ R <sub>s</sub> and complement receptors advantageous to therapeutic applications requiring low effector activation.                                                                                                                                                                                                                                                                                                                                  |
|                                                        | IgG3          | Activates complement and Fc $\gamma$ R-mediated functions more efficiently than other IgG subclasses, although also more susceptible to proteolysis and exhibits a shorter half-life. However, a recent study identified an allotype that exhibits a considerably longer half-life (Stapleton et al, 2011).                                                                                                                                                                         |
|                                                        | IgA, IgE, IgM | Possibly useful for vaccination strategies. IgA-ICs have been shown to lead to protection from mucosal pathogens (Bakema & van Egmond, 2011b). Studies with IgE mAbs suggest utility in cell-based tumor vaccines (Karagiannis et al, 2011). Naturally polymeric IgM may mimic the "depot-effect" of adjuvants (Czajkowsky et al, 2010), is involved in Ab subclass switching (Kavery et al, 2012), and has been shown to be an excellent adjuvant in vaccines (Harte et al, 1983). |
| <b>Modify lower hinge-C<math>\gamma</math>2 domain</b> | Mutate        | Location of binding sites of Fc $\gamma$ R <sub>III</sub> A (and probably other FcR <sub>s</sub> ) and C1q. Mutations that enhanced affinity to Fc $\gamma$ R <sub>III</sub> A improved ADCC activity (Shinkawa et al, 2003; Stavenhagen et al, 2008).                                                                                                                                                                                                                              |
|                                                        | Lengthen      | IgG3 has an extended hinge region. Other molecular extensions, such as SEEDbodies (Muda et al, 2011), are also possible.                                                                                                                                                                                                                                                                                                                                                            |
| <b>Mutate CH2/CH3 junction</b>                         | FcRn (Trim21) | Mutations that improved FcRn interaction also increased <i>in vivo</i> half-life and therapeutic efficacy (Zalevsky et al, 2010). Trim21 also binds within the same region and so mutations in this region will also likely influence antibody-dependent intracellular neutralization by Trim21 (McEwan et al, 2011).                                                                                                                                                               |
| <b>Modulate glycosylation</b>                          | FcR           | De-fucosylation increases affinity for Fc $\gamma$ R <sub>III</sub> A (Shinkawa et al, 2003; Stavenhagen et al, 2008).                                                                                                                                                                                                                                                                                                                                                              |
|                                                        | IVIG          | Efficacy results from interaction with inhibitory sialic acid receptors, including DC-SIGN and Siglec-2 (Anthony et al, 2011; Seit   et al, 2010). Enhanced sialic acid content lowers dosage requirement (Mekhaieel et al, 2011a).                                                                                                                                                                                                                                                 |
| <b>Optimize fusion partner</b>                         | Therapy       | Differences in the affinity or stoichiometry of the fused partner for transmembrane TNF- $\alpha$ believed responsible for differences in clinical response between etanercept and infliximab (Van den Brande et al, 2003).                                                                                                                                                                                                                                                         |
|                                                        | Vaccine       | With monomeric fusions, use of an Ag that recognizes receptors on APCs would enable cross-linking with Fc $\gamma$ R <sub>s</sub> , which is required for a well-balanced immune response. The fusion partner can also affect binding to Fc $\gamma$ R <sub>s</sub> (Mekhaieel et al, 2011b).                                                                                                                                                                                       |
| <b>Increase valency</b>                                |               | Expected to be generally useful strategy to increase potency of therapy and enable binding to receptors that only bind polymeric ICs, for example FcRL4 & FcRL5. Successful strategies include biosynthetic hexameric complexes (Mekhaieel et al, 2011b) and IgM-based complexes (Ammann et al, 2012).                                                                                                                                                                              |
